# 1 Transgenerational dispersal plasticity and its fitness consequences are 2 under genetic control

3

4 Hugo Cayuela<sup>1</sup>, Staffan Jacob<sup>2</sup>, Nicolas Schtickzelle<sup>3</sup>, Rik Verdonck<sup>2</sup>, Hervé Philippe<sup>4,5</sup>, Martin  
5 Laporte<sup>1</sup>, Michèle Huet<sup>2</sup>, Louis Bernatchez<sup>1</sup>, Delphine Legrand<sup>2</sup>

6

7 <sup>1</sup>Département de Biologie, Institut de Biologie Intégrative et des Systèmes (IBIS), Université  
8 Laval, Pavillon Charles-Eugène-Marchand, Québec, QC G1V 0A6, Canada

9 <sup>2</sup>Theoretical and Experimental Ecology Station (UMR 5371), National Centre for Scientific  
10 Research (CNRS), Paul Sabatier University (UPS), Moulis, France

11 <sup>3</sup>Université catholique de Louvain, Earth and Life Institute, Biodiversity Research Centre,  
12 Louvain-la-Neuve, Belgium

13 <sup>4</sup>Centre for Biodiversity Theory and Modelling, Station d'Ecologie Théorique et Expérimentale  
14 du CNRS, 09200 Moulis, France

15 <sup>5</sup>Département de Biochimie, Centre Robert-Cedergren, Université de Montréal, Montréal, QC  
16 H3C 3J7, Canada

17

18

## 19 **Abstract**

20 Phenotypic plasticity, the ability of one genotype to produce different phenotypes in different  
21 environments, plays a central role in species' response to environmental changes.  
22 Transgenerational plasticity (TGP) allows the transmission of this environmentally-induced  
23 phenotypic variation across generations, and can influence adaptation. To date, the genetic  
24 control of TGP, its long-term stability, and its potential costs remain largely unknown, mostly  
25 because empirical demonstrations of TGP across many generations in several genetic  
26 backgrounds are scarce. Here, we examined how genotype determines the TGP of dispersal, a  
27 fundamental process in ecology and evolution. We used an experimental approach involving  
28 ~200 clonal generations in a model-species of ciliate to determine if and how TGP influences the  
29 expression of dispersal-related traits in several genotypes. Our results show that morphological  
30 and movement traits associated with dispersal are plastic, and that these modifications are  
31 inherited over at least 35 generations. We also highlight that genotype modulates the fitness costs  
32 and benefits associated with plastic dispersal strategies. Our study suggests that genotype-  
33 dependent TGP could play a critical role in eco-evolutionary dynamics as dispersal determines  
34 gene flow and the long-term persistence of natural populations. More generally, it outlines the  
35 tremendous importance that genotype-dependent TGP could have in the ability of organisms to  
36 cope with current and future environmental changes.

37

## 38 **Significance**

39 The genetic control of the transgenerational plasticity is still poorly understood despite its critical  
40 role in species responses to environmental changes. We examined how genotype determines  
41 transgenerational plasticity of a complex trait (*i.e.*, dispersal) in a model-species of ciliate across  
42 ~200 clonal generations. Our results provide evidence that plastic phenotypic variation linked to  
43 dispersal is stably inherited over tens of generations and that cell genotype modulates the  
44 expression and fitness cost of transgenerational plasticity.

45

## 46 Introduction

47

48 Transgenerational plasticity (TGP) is a central mechanism in the evolution of the living world  
49 (Uller 2008, Herman & Sultan 2011). TGP occurs when abiotic (e.g., Galloway & Etterson 2007,  
50 Marshall 2008, Heckwolf et al. 2018) and biotic (Dantzer et al. 2013) environmental conditions  
51 alter the phenotype of parents and when those changes then affect offspring phenotypic  
52 expression. For instance, parents can produce young with phenotypic characteristics that increase  
53 their fitness when exposed to similar environmental conditions (*i.e.*, adaptive TGP; e.g., Dantzer  
54 et al. 2013). Alternatively, phenotypic modifications induced by TGP may decrease offspring  
55 performance via transgenerational costs (*i.e.*, maladaptive TGP; e.g., Marshall 2008). The ability  
56 to transmit and express an advantageous phenotype in the next generation(s), or to mitigate the  
57 costs of TGP, could depend on the genetic background (Herman & Sultan 2016), similar to  
58 phenotypic plasticity in general. Indeed, evolution of reaction norms (slope and curvature) and  
59 the mitigation of plastic costs can depend on specific genetic variants (*i.e.*,  $G \times E$  interactions;  
60 Gerken et al. 2015), epigenetic marks under strict or partial genetic control (Kooke et al. 2015)  
61 and the regulation of gene expression (Murren et al. 2015). However, with the exception of the  
62 predictions from a handful of theoretical models (Greenspoon & Spencer 2018), the role of  
63 genetic background in TGP evolution remains poorly understood despite its critical importance  
64 for the ability of the living to cope with current global change (Guillaume et al. 2016, Donelson et  
65 al. 2017).

66 Dispersal, the movement of individuals potentially leading to gene flow (Ronce 2007), is  
67 a highly relevant candidate for investigating TGP mechanisms. Dispersal is a complex and  
68 multidimensional phenotype, which is highly plastic at all its stages (emigration, transience, and  
69 emigration; Clobert et al. 2009, Cote et al. 2017) and under partial genetic control (Saastamoinen  
70 et al. 2018). Its evolution is determined by the balance between the fitness benefit of moving (for  
71 instance, to escape local detrimental conditions for survival or reproduction) and the related costs  
72 (Clobert et al. 2009, Bonte et al. 2012). Dispersal is especially constrained by direct (*e.g.*, energy  
73 and time) costs incurred during the displacements in the landscape matrix and indirect costs  
74 associated with the expression of phenotypic traits facilitating dispersal (Bonte et al. 2012). These  
75 associations between dispersal and other traits are called “dispersal syndromes” (Ronce & Clobert  
76 2012) and may result in trade-offs when traits are negatively correlated with fitness components,  
77 notably due to gene pleiotropy (Saastamoinen et al. 2018). Studies have suggested that TGP may  
78 facilitate the transmission of traits across generations that improve dispersal in a given  
79 environmental context (Bitume et al. 2015), while offering the possibility to reverse or explore  
80 other phenotypic states if the environment changes again (Saastamoinen et al. 2018). In absence  
81 of empirical evidence, one might expect that TGP for dispersal could occur in concert with the  
82 transmission of its fitness consequences across generations. In addition, the genetic background  
83 of parents could affect the ability to transmit dispersal-related traits and could modulate fitness  
84 costs associated to the expression of those traits across generations. However, these hypotheses  
85 have not been yet tested due to difficulties in studying TGP across many generations and across  
86 different genotypes.

87 Here, we investigated the genetic control of TGP for dispersal-related traits and the  
88 related fitness consequences in the protist *Tetrahymena thermophila*. This species reproduces  
89 clonally in standard laboratory conditions (Bell & Stein 2017), with the availability of several  
90 genotypes showing different degrees of dispersal plasticity (*e.g.*, Schtickzelle et al. 2009,  
91 Pennekamp et al. 2014, Jacob et al. 2016). It thus represents an excellent biological model to  
92 study TGP for dispersal. We used a procedure of successive dispersal trials in controlled

93 microcosms to produce two cell lines, dispersing vs non-dispersing cells, in four isogenic strains  
94 (*i.e.* negligible genetic variation inside a strain) thereafter called “D3, D4, D6 and D9”  
95 (**Supplementary material, Fig.S1**). To control for genetic variation while testing whether TGP  
96 explains experimental patterns, mother cultures were established from the isolation of a single  
97 cell for each genotype, and these cultures were then split into five replicates. Experiments were  
98 also limited to six weeks with one dispersal trial per week (~200 asexual generations for the  
99 entire experiment). This procedure prevents the possibility that pre-existing genetic variation  
100 explains the observed phenotypic pattern during experiment and excludes a major role of new  
101 genetic variation. Before the first dispersal trial, we verified the degree of genetic control in a set  
102 of morphological (cell size and shape) and movement (velocity and linearity) traits related to  
103 dispersal in *T. thermophila*, as well as in fitness using cell growth as a proxy (*e.g.*, Orr 2009).  
104 Then, during the first dispersal trial, we examined if dispersing and non-dispersing cells differ in  
105 their morphological and movement traits, resulting in the existence of a plastic dispersal  
106 syndrome (*e.g.*, Ronce & Clobert 2012, Stevens et al. 2013, Legrand et al. 2016). Next, we  
107 investigated how the genetic background determines the plastic response of these dispersal-  
108 related traits during the six successive dispersal trials (separated by ~35 cell divisions). We  
109 especially tested the hypotheses that (1) the dispersal status of ancestors affects the phenotype of  
110 descendants across several generations (existence of TGP), and that (2) the strength of immediate  
111 and transgenerational plastic response varies with the genetic background. We also examined (3)  
112 if the observed TGP was gradual or stable when repeated dispersal trials are experienced by  
113 ancestors (*e.g.*, Vastenhouw et al. 2006, Remy 2010, Sentis et al. 2018). Finally, we tested that  
114 (4) dispersing cells incur a fitness cost (Bonte et al. 2012) at the first dispersal trial and whether  
115 this cost is cumulative through generations and modulated by the genotype.

116

## 117 **Results**

118

### 119 *Trait covariation, fitness and dispersal syndrome after the first trial*

120

121 Before the initial dispersal trial ( $t=0$ , see **Fig.S1**), we examined the individual covariation among  
122 the four tested dispersal-related traits (**models 1 of Table S1**). Here we show only significant  
123 associations with an explained variation higher than 1% (based on  $R^2$ ), which we consider as  
124 potentially biologically relevant. We found that velocity was positively correlated to movement  
125 linearity ( $R^2 = 0.05$ ,  $\chi^2 = 2533.10$ ,  $p < 0.0001$ ) and cell shape ( $R^2 = 0.16$ , LR test:  $\chi^2 =$   
126  $11926.00$ ,  $p < 0.0001$ ; the fastest cells had the most linear movements and the most elongated  
127 cells were the fastest). Furthermore, cell shape and movement linearity were positively related  
128 ( $R^2 = 0.02$ ,  $\chi^2 = 1996.40$ ,  $p < 0.0001$ ; the most elongated cells had the most linear movements,  
129 see **Table S3** for all relationships). In addition to these four phenotypic traits, we measured cell  
130 growth rate estimated from 15 days (~75 generations), a common fitness proxy in *T. thermophila*.  
131 Growth rate was negatively correlated to cell shape ( $R^2 = 0.45$ ,  $\chi^2 = 4.15$ ,  $p = 0.04$ ), but no  
132 significant relationship was found with cell size ( $R^2 = 0.14$ ,  $\chi^2 = 1.21$ ,  $p = 0.27$ ), linearity ( $R^2 =$   
133  $0.08$ ,  $\chi^2 = 0.69$ ,  $p = 0.40$ ) and velocity ( $R^2 = 0.12$ ,  $\chi^2 = 0.98$ ,  $p = 0.32$ ).

134 We then examined the effect of genotype identity on the four phenotypic traits (**models 2**  
135 **of Table S1**). Genotype explained 46% of cell size variation ( $\chi^2 = 90.31$ ,  $p < 0.0001$ ), 26% of  
136 cell shape variation ( $\chi^2 = 64.67$ ,  $p < 0.0001$ ), 7% of movement linearity variation ( $\chi^2 = 49.39$ ,  $p$   
137  $< 0.0001$ ), and 5% of velocity variation ( $\chi^2 = 11.47$ ,  $p = 0.009$ ). Furthermore, we showed that  
138 genotype identity explained 87% of variation in growth rate ( $\chi^2 = 44.65$ ,  $p < 0.0001$ ). These

139 results indicate strong phenotypic differences between the genetic backgrounds used in our  
140 experiments.

141 Next, we investigated dispersal syndrome by performing an immediate quantification of  
142 the association between dispersal and phenotypic traits just after the first dispersal trial ( $tr0$ ; see  
143 **models 3 of Table S1**). Dispersing cells were more elongated ( $R^2 = 0.02$ ,  $\chi^2 = 61.94$ ,  $p <$   
144  $0.0001$ ) and swam faster ( $R^2 = 0.03$ ,  $\chi^2 = 77.69$ ,  $p < 0.0001$ ) than non-dispersing cells. By  
145 contrast, dispersing and non-dispersing cells did not significantly differ in terms of size ( $R^2 =$   
146  $0.001$ ,  $\chi^2 = 2.18$ ,  $p = 0.13$ ) and movement linearity ( $R^2 = 0.001$ ,  $\chi^2 = 2.14$ ,  $p = 0.16$ ). Fitness  
147 differed between the dispersing and non-dispersing cells of each genotype: dispersing cells had  
148 lower growth rate than non-dispersing ones ( $R^2 = 0.04$ ,  $\chi^2 = 15.48$ ,  $p < 0.0001$ ), indicating a  
149 dispersal-related fitness cost.

150 Altogether, our results highlight the existence of trait-trait correlations and a plastic  
151 dispersal syndrome. As cell size and movement linearity marginally differed between dispersing  
152 and non-dispersing cells, we focused further analyses on cell velocity and shape, the two traits  
153 that most contributed to dispersal.

154

#### 155 *Effect of ancestor dispersal status and genotype on descendant phenotype across generations*

156

157 Following each dispersal trial, we first tested for the persistence of trait divergence between  
158 dispersing and non-dispersing cells after ~35 asexual generations in common garden conditions in  
159 the whole dataset (**models 1.1 of Table S2; Fig S1**). The dispersal status of cell ancestors, *i.e.*  
160 cells from the dispersing *vs* non-dispersing selected lines, affected descendants' velocity ( $R^2 =$   
161  $0.05$ ,  $\chi^2 = 8.58$ ,  $p = 0.003$ ) and shape ( $R^2 = 0.01$ ,  $\chi^2 = 8.58$ ,  $p = 0.03$ ). Cells with a dispersing  
162 ancestor recurrently had a higher velocity and a more elongated shape than those with a non-  
163 dispersing ancestor (**Fig.1A** and **Fig.1B**).

164 Second, we examined how the strength of the effect of ancestor dispersal status on  
165 phenotypic traits differed among genotypes (**models 1.2 of Table S2** and model outputs presented  
166 in **Table S5**). The ancestor dispersal status explained from 0.3% to 13% of velocity variation in  
167 D6 and D9 respectively, and from 0.1 and 11% of shape variation in D6 and D9 respectively.  
168 Cells with dispersing ancestors had higher dispersal rates than cells with non-dispersing ancestors  
169 in D9 ( $R^2 = 0.06$ ,  $\chi^2 = 6.65$ ,  $p = 0.01$ ); the effect was marginal in D3 ( $R^2 = 0.04$ ,  $\chi^2 = 3.28$ ,  $p =$   
170  $0.07$ ) and D6 ( $R^2 = 0.04$ ,  $\chi^2 = 3.12$ ,  $p = 0.08$ ), and not significant in D4 ( $R^2 = 0.02$ ,  $\chi^2 = 1.39$ ,  $p$   
171  $= 0.23$ ).

172 Increasing number of dispersal trials experienced by each experimental line did not cause  
173 a gradual change of trait values with time (**models 2 of Table S2**). The shape and velocity  
174 differences between the descendants of dispersing and non-dispersing cells appeared at  $tr0$  and  
175 did not increase nor decrease over the following trials (from  $tr1$  to  $tr6$ , **Fig.1D** and **Fig.1E**).  
176 Accordingly, the association between these phenotypic traits and the number of dispersal trials  
177 was better described by a logarithmic relationship than a linear relationship (velocity,  $\chi^2 = 35.40$ ,  
178  $p < 0.0001$ ; shape,  $\chi^2 = 18.35$ ,  $p = 0.0001$ ). In addition, the interaction between 'ancestor  
179 dispersal status' and 'number of trials' was not supported by the data for the two phenotypic traits  
180 (**Table S4**).

181 We then tested how stable these transgenerational changes of cell phenotype were by  
182 comparing the phenotype of cells measured after each dispersal trial and the phenotype of their  
183 descendants after ~ 35 asexual generations in common garden (**model 3 of Table S2**). Cells with  
184 a dispersing ancestor had a lower velocity ~35 generations after the trial than immediately after  
185 the trial ( $R^2 = 0.23$ ,  $\chi^2 = 82.09$ ,  $p < 0.0001$ ), indicating that this trait was partially reversible

186 under standard environmental conditions. Yet, the reversibility was not sufficiently strong to  
 187 eliminate the effect of ancestor dispersal status on descendant phenotype (**Fig.1A**). By contrast,  
 188 the shape of descendants was more elongated than that of their ancestor ( $\chi^2 = 0.09$ ,  $P = 52.19$ ,  $p$   
 189  $< 0.0001$ ), suggesting a slight exacerbation of this trait after ~35 generations.  
 190

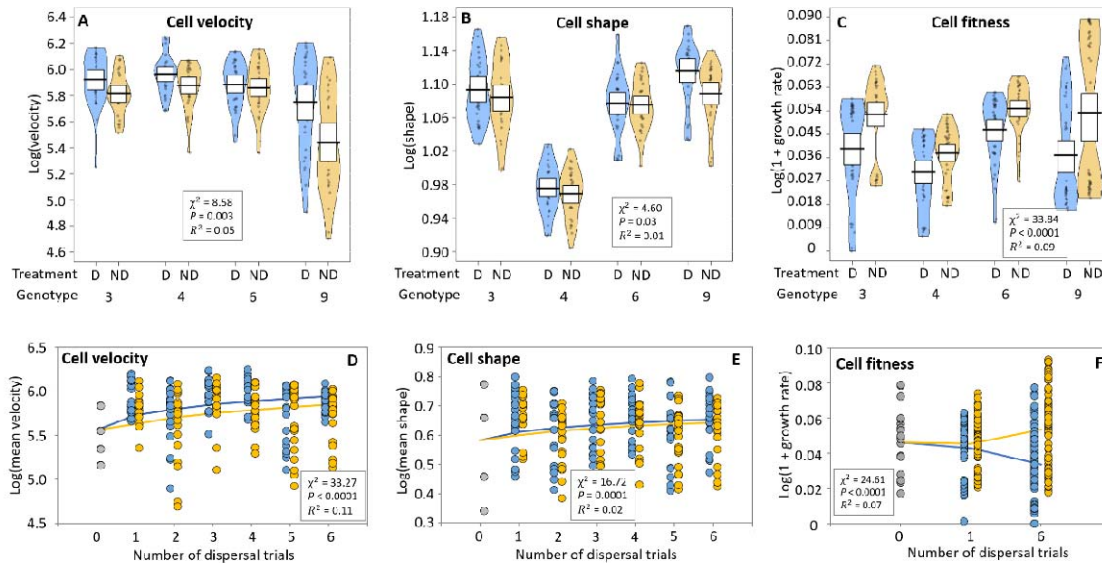

191

192 **Fig.1.** Transgenerational plasticity for dispersal and its fitness cost: effect of ancestor dispersal  
 193 status (dispersing ancestor in blue and non-dispersing ancestor in yellow) on phenotypic traits  
 194 (cell shape and velocity) and fitness of descendants ~35 asexual generations after dispersal trials  
 195 (i.e., just before the next one) in the four studied genotypes (D3, D4, D6, and D9). Mother  
 196 cultures are represented in grey. (A-B-C) We show relationships where the effect of the ancestor  
 197 dispersal status on phenotypic traits was significant with a p-value threshold of  $p = 0.05$ ; non-  
 198 significant relationships are shown in **Supplementary material, Fig. S2**. We provide marginal  
 199 of the mixed model and outputs of the likelihood ratio test ( $\chi^2$  and P-value) used to examine the  
 200 effect of dispersal trial on phenotypic traits. (D-E-F) Effect of the number of dispersal trials  
 201 experienced by ancestors on cell phenotype. The terms ‘ancestor dispersal status’ and ‘number of  
 202 trials’ were entered in an additive way in the model (the interaction was not supported by the  
 203 data). We give marginal  $\chi^2$  of the sum of fixed effects in the mixed model and outputs of the  
 204 likelihood ratio test used to examine the effect of number of dispersal trials on phenotypic traits.  
 205

206

207

### Effect of genotype and ancestor dispersal status on descendant fitness through time

208

209 We examined growth rates of dispersing and non-dispersing lines at three dispersal trials ( $tr_0$ ,  $tr_1$   
 210 and  $tr_6$ ; see **model 1.1 of Table S2** and **Fig S1**). Pooling these three times and the four genotypes  
 211 revealed that cells with a dispersing ancestor had a lower growth than those with a non-dispersing  
 212 ancestor ( $\chi^2 = 0.09$ ,  $P = 33.84$ ,  $p < 0.0001$ , **Fig 1C**), which indicates a transgenerational fitness  
 213 effect of dispersal trials on descendants. Looking at temporal trends revealed that growth of cells  
 214 with dispersing ancestors decreased between  $tr_0$  and  $tr_1$  and between  $tr_1$  and  $tr_6$  while it  
 215 increased in cells with non-dispersing ancestors (**Fig 1F**,  $\chi^2 = 24.61$ ,  $p < 0.0001$ ; **model 2 of**  
 216 **Table S2**).

217 An analysis of the data per genotype showed that the transgenerational fitness cost was  
 218 modulated by the genetic background (**model 1.2 of Table S2**). Although cells with a dispersing  
 219 ancestor all experienced a fitness loss, variation explained by the genotype (dispersing vs non-  
 220 dispersing line) was more important for D3 and D6 (13% and 10% respectively) than for D9 and  
 221 D4 (6% and 5% respectively) (**Table S6**).

222 Finally, we found that the fitness consequences of dispersal were weakly reversible as  
 223 growth rate was similar just after dispersal trials and ~35 generations later for both dispersing ( $\beta = 0.004$ ,  
 224  $\beta = 2.03$ ,  $p = 0.15$ ) and non-dispersing cells ( $\beta = 0.001$ ,  $\beta = 0.45$ ,  $p = 0.50$ ).  
 225

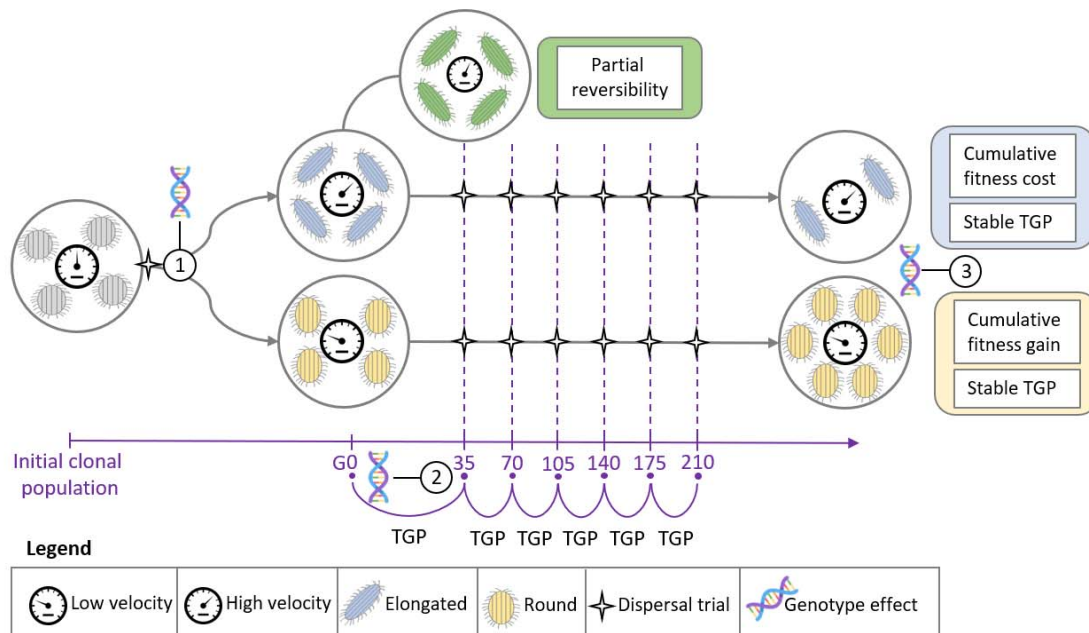

226

227 **Fig.2.** Transgenerational plasticity for dispersal and its cost in *Tetrahymena thermophila*. At  
 228 generation 0 (G0), the initial dispersal trial is performed (dispersal trials are represented by the  
 229 black stars). After the first trial, cells are more elongated and swim faster than in mother  
 230 cultures, but dispersing cells (in blue) have a more elongated shape and a higher velocity than  
 231 non-dispersing cells (yellow) due to plastic changes within genotypes. The strength of phenotypic  
 232 differences between dispersing and non-dispersing cells differ between genotypes (1). The  
 233 dispersal status of the ancestor affects the phenotype of descendants: cells with a dispersing  
 234 ancestor conserve a dispersing-like phenotype (elongated and fast) via transgenerational  
 235 plasticity during whole the experiment. Yet, the strength of this effect depends on cell genotype  
 236 (2). These phenotypic changes are only partially reversible (in green) after ~35 generations in  
 237 common garden (velocity slightly decreases while elongation slightly increases, fitness is stable).  
 238 The number of dispersal trials experienced by the ancestors of a cell does not affect its  
 239 phenotype: the effect of transgenerational plasticity is not gradual. Indeed, the phenotypic  
 240 switches appear at the first trial and are then maintained throughout the experiment. By contrast,  
 241 cells with dispersing ancestors experience a gradual decrease in fitness along with the number of  
 242 dispersal trials experienced by their ancestors. Likewise, the fitness of cells with non-dispersing  
 243 ancestors increases with the number of dispersal trials experienced. Genotype modulates this  
 244 fitness effects of transgenerational plasticity for dispersal (3).

245

246

247

## 248 Discussion

249

250 During the initial dispersal trial, our results confirmed the existence of a plastic dispersal  
251 syndrome in *T. thermophila*. Within the four genotypes, dispersing cells had a more elongated  
252 shape and a higher velocity than non-dispersing cells, those two traits generally facilitating  
253 dispersal in this species (Fjerdingstad et al. 2007, Pennekamp et al. 2014, Jacob et al. 2016). The  
254 difference of velocity and shape between dispersing and non-dispersing cells differed among  
255 genotypes. Furthermore, cells with a dispersing phenotype experienced a fitness loss that was  
256 modulated by the genotype, corroborating the results of previous studies in *T. thermophila*  
257 (Schtickzelle et al. 2009, Jacob et al. 2016). We also confirmed that the described dispersal  
258 syndrome and costs result from strong  $G \times E$  interactions and that intragenerational plasticity is  
259 an important driver in dispersal evolution of *T. thermophila* (Pennekamp et al. 2014) and beyond  
260 (Saastamoinen et al. 2018). Except for our fitness proxy, the relationships between the dispersal  
261 strategies and the correlated traits were weak in our conditions. In our trials, dispersal cues  
262 perceived by cells were mainly linked to changes in density and spatial conformation of habitats,  
263 two important drivers of dispersal (pipetting of ~100,000 cells from mother cultures kept in a  
264 2mL-well placed in a fresh and empty 1.5mL tube connected by a thin corridor to an empty-of-  
265 cell arrival tube). Further experiments in conditions where dispersal might be more beneficial  
266 (e.g., temperature or chemical stress, interspecific competition) should inform on the context-  
267 dependency of the highlighted dispersal syndrome, especially for the lability and strength of trait  
268 correlations (Cote et al. 2017).

269 Our study demonstrated that plastic phenotypic variation linked to dispersal is stably  
270 inherited when cells are exposed to successive dispersal trials separated by ~35 asexual  
271 generations (**Fig.2**). Cells conserved the phenotypic characteristics (shape and velocity)  
272 associated with the dispersal status of their ancestors. Our experimental protocol allows us to  
273 reasonably assume that the detected phenotypic variation in the descendants results from TGP  
274 rather than in genic selection. Indeed, we have eliminated most genetic variation within each  
275 replicate at the beginning of the experiment using a single mother cell, which rules out the  
276 possibility of selection from standing genetic variation (see further considerations in  
277 **Supplement**). We also believe very unlikely that *de novo* mutations have been simultaneously  
278 recruited in the four genotypes during the 7-days growth period preceding the first dispersal trial.  
279 As a result, the phenotypic changes observed after the first dispersal trial, and maintained at least  
280 during ~35 generations, are due to transgenerational plastic mechanisms. Examples of TGP  
281 observed for more than a few generations are not frequent and mostly found in other (partially)  
282 asexual species (Vastenhouw et al. 2006). Here, we demonstrate that TGP over tens of asexual  
283 generations can influence dispersal, an eco-evolutionary force that could act to enhance gene  
284 flow. Future research should determine if TGP for dispersal occurs also across sexual generations  
285 in this ciliate.

286 We also observed a cumulative fitness cost associated with dispersal, while non-  
287 dispersing cells increased their fitness. To the best of our knowledge, cumulative fitness costs of  
288 plasticity across ~200 generations have never been described in the context of dispersal. While  
289 fitness dynamics should be built on more time points and for more generations in the future, our  
290 result is of utmost importance because differential costs and benefits associated with dispersal  
291 strategies can drive their coexistence (Bonte et al. 2012). *T. thermophila* thus offers an interesting  
292 system to test a series of predictions and calibrate models on the role of plasticity, dispersal, and

293 their costs and benefits on eco-evolutionary dynamics (*e.g.*, Scheiner et al. 2012, Scheiner et al.  
294 2017). Future work in ciliates and other taxa should also determine the tipping points at which  
295 TGP costs of dispersal would alter colonisation and/or (meta)population dynamics (Doebeli &  
296 Ruxton 1997).

297 At first glance, trait variance explained by our ancestor dispersal status might appear low  
298 (from 1 to 13% depending on the trait and genotype). However, dispersal is a multifaceted  
299 process for which tens (or more) phenotypic traits are involved (Clobert et al. 2009). Therefore, it  
300 might not be surprising that, working on only four candidate traits, we measured moderate  
301 responses in our simple experimental conditions. Besides, cell shape and velocity are involved in  
302 numerous other fundamental cell functions (*e.g.*, feeding, mating, osmoregulation), which  
303 certainly impose constraints on their variance. Finally, fitness differed in mean by 9% between  
304 dispersing and non-dispersing cells, suggesting that transgenerational dispersal plasticity can  
305 strongly impact evolutionary dynamics.

306 In our experiment, plastic changes were only partially reversible between the dispersal  
307 trials. Velocity measured just after each trial was weakly lower after ~35 generations in common  
308 garden, but still higher in dispersing cells with a dispersing ancestor than in dispersing cells with  
309 a non-dispersing ancestor. Dispersing cells with a dispersing ancestor were even more elongated  
310 after the common garden, which might be due to the dispersal treatment itself, or to phenotypic  
311 differences potentially observed between growth stages (Taylor et al. 1976). Finally, the fitness  
312 difference between dispersing and non-dispersing cells was not affected by the common garden.  
313 Such limited reversibility of phenotypes suggests either that the mechanisms responsible for this  
314 dispersal plasticity present a time-lag to fully reverse the phenotypes, or that the environmental  
315 cues triggering the phenotypic reversibility are not entirely reliable (the two hypotheses being  
316 non-exclusive).

317 In absence of substantial genetic variation within the cell lines, the described inheritance  
318 of dispersal-related traits should rely on non-genetic factors causing transgenerational  
319 modifications of gene expression (Devanapally et al. 2015). In *T. thermophila*, epigenetic  
320 mechanisms as DNA methylation (Chung & Yao 2012), microRNA (Mochizuki 2012), or histone  
321 modifications (Morris et al. 2007) might allow the transmission of changes in cell shape and  
322 velocity across clonal generations. As the ciliate somatic genome is highly polyploidized (~45  
323 copies in *T. thermophila*, Doerder et al. 1992), epigenetic modifications induced before or during  
324 the dispersal process could cause differences in the expression of specific copies of homeologous  
325 genes coding for dispersal-related traits (Liu & Adams 2007). In our experimental design, the  
326 absence of sexual reproduction, and therefore the lack of meiotic reprogramming of epimarks,  
327 should facilitate the transgenerational inheritance of epigenetic variants regulating the expression  
328 of homeologous genes (Heard & Martienssen 2014), and should thus foster the TGP for dispersal.  
329 In *T. thermophila*, copy number variation can generate adaptive plastic responses under stressful  
330 conditions with a time lag of at least a few generations (di Fransisco et al. 2018). While it should  
331 be excluded that copy number variation explains the initial phenotypic changes in our experiment  
332 (cells are different from mother cultures in both dispersing and non-dispersing lines at the first  
333 trial), it is possible that epigenetic modifications followed by copy number variations act in  
334 concert to maintain the observed TGP. The time lag associated with copy number regulation  
335 could then account for the partial reversibility of phenotypes observed, as well as progressive  
336 elimination of mRNA, microRNA, or other intracellular molecules potentially responsible for  
337 TGP through cell divisions.

338 Our study showed that genetic background explained the differential persistence of  
339 dispersal phenotypes during ~35 asexual generations (**Fig.2**). As well, cell genotype significantly



340 modulated the transgenerational fitness consequences, where the more canalized genotypes for  
341 dispersal (*i.e.* those presenting the lowest plastic response, D3 and D6) experiencing more costs  
342 when regularly confronted to dispersal trials. This suggests that genotypes able to plastically  
343 express specialized dispersing phenotypes have evolved mechanisms to reduce the associated  
344 costs. Our results therefore revealed that  $G \times E$  interactions drive the TGP for dispersal and its  
345 cost in *T. thermophila*. Phenotypic trade-offs are usually observed in the context of dispersal  
346 (Bonte et al. 2012), but we highlight here an original dependency on the genetic background. A  
347 genetic control of TGP has rarely been observed (see however Devanapally et al. 2015, Vu et al.  
348 2015), and could be caused by the genetic determinism of epimarks' transgenerational  
349 inheritance. Indeed, methylation variation are usually strongly associated with genetic variants in  
350 both *cis* and *trans* (Dubin et al. 2015, Zaghlool et al. 2016), facilitating or constraining the  
351 transmission of epimarks over generations (Richards 2006). In the future, comparisons between  
352 epigenomes and transcriptomes of the tested genotypes should provide mechanistic answers. It  
353 should also be helpful to understand if the parallelism found between the biological replicates of  
354 each genotype and for some traits between genotypes (models all include replicates and  
355 genotypes as variables) relies on similar molecular mechanisms.

356 To conclude, our study provides a first evidence of the role of genetic background in the  
357 TPG and associated cost in a dispersal context. It emphasizes the tremendous importance of  $G \times$   
358  $E$  interactions in the ability of organisms to transmit phenotypic variations induced by the  
359 environment across generations, shedding light on the importance of intraspecific genetic  
360 variation in ecological and evolutionary dynamics (*e.g.*, Raffard et al. 2018). Our results outline  
361 that genotype-dependent TGP likely plays a critical role in the evolution of dispersal, a major  
362 eco-evolutionary force that determines the migration-drift and migration-selection equilibria in  
363 natural populations (Slatkin 1987, Lenormand 2002). Genetically-controlled TGP for dispersal  
364 could also be a central mechanism in biological invasions by allowing a rapid phenotypic  
365 specialization maximizing colonization success and speed (Perkins et al. 2013, Ochocki & Miller  
366 2017), despite a low genetic polymorphism caused by serial founder effects (Excoffier et al.  
367 2009). More broadly, genotype-dependent TGP could facilitate a rapid adjustment to sudden  
368 environmental changes, such as climate change, especially when standing genetic variation is low  
369 and the chances of beneficial mutation recruitment are small. In this regard, it might be of high  
370 concern to determine if the degree of parallelism measured here can also be observed at the inter-  
371 specific level. This would help quantify the importance of plastic mechanisms in biodiversity  
372 response to environmental changes.

373

## 374 **Material and methods**

375

### 376 *Model species and culture conditions*

377

378 *Tetrahymena thermophila* is a 30-to 50- $\mu\text{m}$  ciliated unicellular eukaryote naturally living in  
379 freshwater ponds in North America, which alternates sexual and asexual phases depending on  
380 environmental conditions. The species is a model organism in cell and molecular biology, and its  
381 maintenance under laboratory conditions benefits from decades of experience (Collins 2012). We  
382 used four genotypes originally sampled and kindly provided by F. P. Doerder between 2002 and  
383 2008 in North America (genotype D3, D4, D6, and D9; Pennekamp et al. 2014), and bred  
384 uniquely under clonal conditions. Before and during the experiment, cells were all cultivated in  
385 the same standard conditions: 23°C in climatic chambers in 0.3X synthetic liquid growth media  
386 (0.6% Difco proteose peptone, 0.6% yeast extract) as described in previous studies (Fjerdingstad

387 et al. 2007, Schtickzelle et al. 2009, Jacob et al. 2015). In these conditions, the cell division time  
388 is around 4-6 hours (~5 generations per day). All manipulations were performed in sterile  
389 conditions under a laminar flow hood.

390

### 391 *Protocol of successive dispersal trials*

392

393 We performed an experimental procedure of repeated dispersal trials to investigate how  
394 phenotype of cells is affected by the dispersal status of their ancestors and how the number of  
395 experienced trials affects the phenotype of descendants. Dispersal trials were performed using  
396 standard connected microcosms composed of two habitat patches consisting of 1.5 ml microtubes  
397 connected by a corridor made of 4 mm internal diameter, 2.5-cm long silicone tube (Jacob et al.  
398 2016). These laboratory conditions proved useful to study many aspects of dispersal such as, *e.g.*,  
399 the architecture of dispersal syndromes, the causes of dispersal (Pennekamp et al. 2014,  
400 Fronhofer et al. 2018), the cooperation-colonization trade-off (Jacob et al. 2016), range  
401 expansions (Fronhofer & Altermatt 2015, Fronhofer et al. 2017), or (meta)population and  
402 community dynamics (Fox et al. 2014, Jacob et al. 2019). For a dispersal trial, a fraction of  
403 ~100,000 cells were placed in one of the two patches, called the departure patch while corridors  
404 were closed with clamps. Then, corridors were opened and cells were therefore allowed to either  
405 stay in the departure patch or disperse to the other patch, called arrival patch, over a 4-hours  
406 period. After this period, the corridors were clamped and samples from the two populations of  
407 cells (dispersing in the arrival patch and non-dispersing in the departure patch) were pipetted to  
408 inoculate a new separately growing population.

409 For the four genotypes, we isolated by hand-pipetting one mother cell that reproduced  
410 clonally over a 7-day period in one 2 ml well of a 24-well plate. From this initial mother-culture,  
411 we made five replicates (*i.e.* initial populations) that were cultivated over another 7-days period  
412 (~35 cell divisions; see **Supplementary material, Fig.S1**). Then, these 20 populations (*i.e.*, five  
413 replicates in four genotypes) experienced an initial dispersal trial ( $tr_0$ ) that allowed producing one  
414 subpopulation with dispersing ancestors and one subpopulation with non-dispersing ancestors.  
415 The two subpopulations were subjected to a new dispersal trial every seven days to obtain a total  
416 of six trials ( $tr_1$  to  $tr_6$ ). Over the successive trials, we serially kept and cultivated dispersing cells  
417 and non-dispersing cells in the subpopulations with dispersing and non-dispersing ancestors  
418 respectively (**Supplementary material, Fig. S1**).

419

### 420 *Phenotype and fitness measurements*

421

422 The four phenotypic traits (morphology: cell size and shape; movement: velocity and linearity)  
423 were measured in initial populations. Then, from trials  $tr_0$  to  $tr_6$ , the same traits were measured  
424 just 'before' and 'after' each dispersal trial. The 'before' measurement was used to quantify traits  
425 after 7 days, *i.e.*, around 35 generations, in common garden conditions (standard medium without  
426 dispersal possibility). The 'after' measurement was used to quantify traits at the exact time of  
427 dispersal. Cell size (area in  $\mu\text{m}^2$ ) and shape (cell major/minor axis ratio of a fitted ellipse), as well  
428 as velocity ( $\mu\text{m/s}$ ) and movement linearity (distance in straight line/effective distance covered),  
429 were measured using on automated analysis of digital images and videos (Pennekamp &  
430 Schtickzelle 2013, Pennekamp et al. 2015). For each sample of cells, we considered five technical  
431 replicates (10  $\mu\text{l}$ ) pipetted into one chamber of a multi-chambered counting slide (Kima precision  
432 cell 301890), and took digital pictures under dark-field microscopy (Pennekamp & Schtickzelle  
433 2013). Data from the five technical replicates were pooled in all analyses. We used ImageJ

434 (version 1.47, National Institutes of Health, USA) and BEMOVI (Pennekamp et al. 2015)  
435 softwares to measure morphological and movement variables. Using the same program, we  
436 calculated dispersal rates at each dispersal trial by quantifying cell density in the patches of  
437 departure and arrival using the automated analysis of digital images described above (see  
438 Pennekamp et al. 2014).

439 We measured cell fitness in initial populations and after the dispersal trial (for both dispersing  
440 and non-dispersing cells at three dispersal trials ( $tr0$ ,  $tr1$ , and  $tr6$ ) using standard population  
441 growth analyses. Small numbers of cells (~100 cells) were transferred in four technical replicates  
442 into 96-well plates filled with 250  $\mu$ l of fresh growth media. Cultures were maintained at 23 °C  
443 and absorbance measurements at 550 nm were performed every 2 h for 2 weeks using an  
444 automated microplate reader (Tecan Infinite Spectrophotometer with a Connect robotized arm).  
445 We then computed the growth rate as the maximum slope of population growth through time and  
446 the maximal population density as the density reached at the plateau by smoothing the absorbance  
447 data using general additive model (gam package; Hastie 2018), and fitting a spline-based growth  
448 curve using the *grofit* package of R (*gcfit* function; Kahm et al. 2010). For simplicity, we present  
449 results on growth rate, the most frequently used fitness proxy (Orr 2009), given that results were  
450 qualitatively similar using maximal density (data not shown).

451

#### 452 *Statistical analyses*

453

454 **Trait covariation (models 1 of Table S1).** First, we assessed the initial relationships between the  
455 four phenotypic traits (i.e., cell shape, cell size, movement velocity and linearity). We used  
456 phenotypic measurements recorded prior the first dispersal trial ( $tr0$ ) to assess between-traits  
457 covariation pattern. A linear mixed model was used to examine the correlation between each pair  
458 of traits. One of the two phenotypic trait was treated as the dependent variable whereas the other  
459 was introduced in the model as an explanatory term. The dependent variable was log-transformed  
460 and the explanatory variable was z-scored. The strain and the replicate were introduced as  
461 random effects in the model. For all analyses implicating linear mixed models, we used restricted  
462 maximum likelihood optimization. Normality of the residuals was examined graphically using a  
463 quantile–quantile plot. We used a likelihood ratio test to assess the significance of the  
464 relationship, i.e. comparing the models with and without the explanatory term. We calculated  
465 marginal  $R^2$  to quantify the proportion of variation explained by the explanatory variable only.

466 **Effect of genotype on cell phenotype and fitness (models 2 of Table S1).** We evaluated  
467 the influence of the cell genetic background on the four phenotypic traits and cell growth rate  
468 (i.e., a proxy of cell fitness) before the first dispersal trial at  $tr0$ . We used linear mixed models in  
469 which the log-transformed phenotypic traits were introduced as dependent variables, cell  
470 genotype as the explanatory variable (i.e. a discrete variable with four modalities) and the  
471 replicates as random effects. We used a similar procedure to examine the effect of genotype on  
472 fitness at  $tr0$ .

473 **Dispersal syndrome and dispersal-related fitness cost (models 3 of Table S1).** We  
474 examined how morphology and movement behavior correlate with cell dispersal status after the  
475 first dispersal trial ( $tr0$ ). We made general analysis where all genotypes were combined. We used  
476 linear mixed models where the log-transformed phenotypic traits were introduced as dependent  
477 variables, the cell dispersal status as the explanatory variable (i.e., a discrete variable with two  
478 modalities, dispersing vs non-dispersing), and the genotype and replicate as random effects.

479 **Effect of genotype and ancestor dispersal status on descendant phenotype and**  
480 **fitness (models 1 of Table S2).** We examined the effect of ancestor dispersal status (dispersing

481 vs non-dispersing lines coded as a discrete variable) on phenotypic trait and fitness of  
482 descendants after ~ 35 cell divisions (*i.e.*, 7 days). First, we made a general analysis using linear  
483 mixed models where log-transformed phenotypic traits and fitness were introduced as dependent  
484 variables, and the ancestor dispersal status as discrete explanatory variable. The genotype, the  
485 replicate, and the number of dispersal trials experienced by ancestor were included in the model  
486 as random effects (**models 1.1 of Table S2**). Then, we conducted a partial analysis where we  
487 analyzed the four genotypes separately (**models 1.2 of Table S2**).

488 **Effect of the number of successive dispersal trials on descendant phenotype and**  
489 **fitness (models 2 of Table S2)**. We retrieved the same linear mixed models used to investigate  
490 the effect of ancestor dispersal status on phenotype and fitness, but the number of dispersal trials  
491 experienced was removed from the random effects and introduced in the fixed part of the model.  
492 For the phenotypic traits, the number of dispersal trials (from 0 to 6) was incorporated as a  
493 continuous variable. We tested additive and interactive effects (ancestor dispersal status  $\times$  number  
494 trials) of the variable, and considered both linear and logarithmic relationships; a likelihood ratio  
495 test has been performed to compare the two relationships. For cell fitness, the number of dispersal  
496 trials (0, 1, and 6) was entered in the model as discrete variable, and both additive and interactive  
497 effects were examined.

498 **Reversibility of transgenerational plastic changes (models 3 of Table S2)**. We  
499 examined how stable were the transgenerational changes of cell phenotype by comparing the  
500 phenotype of cells measured after each dispersal trial and the phenotype of their descendants after  
501 ~ 35 asexual generations in common garden (**model 3 of Table S2**) in dispersing lines. We used  
502 linear mixed models where log-transformed phenotypic traits and fitness were introduced as  
503 dependent variables, and the type of cell as explanatory variable. We included the genotype, the  
504 replicate, and the number of dispersal trials experienced by ancestor as random effects.

505

#### 506 **Acknowledgements**

507 H.C. is supported by a Vanier-Banting postdoctoral fellowship. This work was supported by the  
508 French Laboratory of Excellence project TULIP (ANR-10-LABX-41). The authors warmly thank  
509 Julien Cote and Kyle Wellband for helpful discussion on this manuscript.

510

#### 511 **References**

512

- 513 Bell, A. M., & Stein, L. R. (2017). Transgenerational and developmental plasticity at the  
514 molecular level: Lessons from *Daphnia*. *Molecular Ecology*, 26, 4859-4861.
- 515 Bitume, E. V., Bonte, D., Ronce, O., Olivieri, I., & Nieberding, C. M. (2014). Dispersal distance  
516 is influenced by parental and grand-parental density. *Proceedings of the Royal Society B:*  
517 *Biological Sciences*, 281, 20141061.
- 518 Chung, P. H., & Yao, M. C. (2012). Tetrahymena thermophila JMJD3 homolog regulates H3K27  
519 methylation and nuclear differentiation. *Eukaryotic Cell*, 11, 601-614.
- 520 Clobert, J., Le Galliard, J. F., Cote, J., Meylan, S., & Massot, M. (2009). Informed dispersal,  
521 heterogeneity in animal dispersal syndromes and the dynamics of spatially structured  
522 populations. *Ecology Letters*, 12, 197-209.
- 523 Cote, J., Bestion, E., Jacob, S., Travis, J., Legrand, D., & Baguette, M. (2017). Evolution of  
524 dispersal strategies and dispersal syndromes in fragmented landscapes. *Ecography*, 40, 56-73.
- 525 Dantzer, B., Newman, A. E., Boonstra, R., Palme, R., Boutin, S., Humphries, M. M., &  
526 McAdam, A. G. (2013). Density triggers maternal hormones that increase adaptive offspring  
527 growth in a wild mammal. *Science*, 340, 1215-1217.

- 528 de Francisco, P., Martín-González, A., Turkewitz, A. P., & Gutiérrez, J. C. (2018). Genome  
529 plasticity in response to stress in *Tetrahymena thermophila*: selective and reversible  
530 chromosome amplification and paralogous expansion of metallothionein genes. *Environmental*  
531 *microbiology*, 20, 2410-2421.
- 532 Devanapally, S., Ravikumar, S., & Jose, A. M. (2015). Double-stranded RNA made in *C. elegans*  
533 neurons can enter the germline and cause transgenerational gene silencing. *Proceedings of the*  
534 *National Academy of Sciences*, 112, 2133-2138.
- 535 Doebeli, M., & Ruxton, G. D. (1997). Evolution of dispersal rates in metapopulation models:  
536 branching and cyclic dynamics in phenotype space. *Evolution*, 51, 1730-1741.
- 537 Doerder, F. P., Deak, J. C., & Lief, J. H. (1992). Rate of phenotypic assortment in *Tetrahymena*  
538 *thermophila*. *Developmental Genetics*, 13, 126-132.
- 539 Donelson, J. M., Salinas, S., Munday, P. L., & Shama, L. N. (2018). Transgenerational plasticity  
540 and climate change experiments: Where do we go from here?. *Global Change Biology*, 24, 13-  
541 34.
- 542 Dubin, M. J., Zhang, P., Meng, D., Remigereau, M. S., Osborne, E. J., Casale, F. P., ... & Jagoda,  
543 J. (2015). DNA methylation in *Arabidopsis* has a genetic basis and shows evidence of local  
544 adaptation. *elife*, 4, e05255.
- 545 Excoffier, L., Foll, M., & Petit, R. J. (2009). Genetic consequences of range expansions. *Annual*  
546 *Review of Ecology, Evolution, and Systematics*, 40, 481-501.
- 547 Fjerdingstad, E. J., Schtickzelle, N., Manhes, P., Gutierrez, A., & Clobert, J. (2007). Evolution of  
548 dispersal and life history strategies—*Tetrahymena* ciliates. *BMC evolutionary biology*, 7(1),  
549 133.
- 550 Fox, J. W., Legault, G., Vasseur, D. A., & Einarson, J. A. (2013). Nonlinear effect of dispersal  
551 rate on spatial synchrony of predator-prey cycles. *PloS one*, 8, e79527.
- 552 Fronhofer, E. A., & Altermatt, F. (2015) Eco-evolutionary feedbacks during experimental range  
553 expansions. *Nature Communications*, 6, 6844.
- 554 Fronhofer, E. A., Gut, S., & Altermatt, F. (2017) Evolution of density-dependent movement  
555 during experimental range expansions. *Journal of Evolutionary Biology*, 30, 2165-2176.
- 556 Fronhofer, E. A., Legrand D., Altermatt, F., Ansart, A., Blanchet, S., Bonte, D., Chaîne, A.,  
557 Dahirel, M., De Laender, F., De Raedt, J., di Gesu, L., Jacob, S., Kaltz, O., Laurent, E., Little,  
558 C. J., Madec, L., Manzi, F., Masier, S., Pellerin, F., Pennekamp, F., Schtickzelle, N., Therry,  
559 L., Vong, A., Winandy, L., Cote, J. (2018) Bottom-up and top-down control of dispersal  
560 across major organismal groups. *Nature Ecology and Evolution*, 2, 1859-1863.
- 561 Galloway, L. F., & Etterson, J. R. (2007). Transgenerational plasticity is adaptive in the wild.  
562 *Science*, 318, 1134-1136.
- 563 Gerken, A. R., Eller, O. C., Hahn, D. A., & Morgan, T. J. (2015). Constraints, independence, and  
564 evolution of thermal plasticity: probing genetic architecture of long- and short-term thermal  
565 acclimation. *Proceedings of the National Academy of Sciences*, 112, 4399-4404.
- 566 Greenspoon, P. B., & Spencer, H. G. (2018). The evolution of epigenetically mediated adaptive  
567 transgenerational plasticity in a subdivided population. *Evolution*, 72, 2773-2780.
- 568 Guillaume, A. S., Monroe, K., & Marshall, D. J. (2016). Transgenerational plasticity and  
569 environmental stress: do paternal effects act as a conduit or a buffer?. *Functional Ecology*, 30,  
570 1175-1184.
- 571 Heard, E., & Martienssen, R. A. (2014). Transgenerational epigenetic inheritance: myths and  
572 mechanisms. *Cell*, 157, 95-109.

- 573 Heckwolf, M. J., Meyer, B. S., Döring, T., Eizaguirre, C., & Reusch, T. B. (2018).  
574 Transgenerational plasticity and selection shape the adaptive potential of sticklebacks to  
575 salinity change. *Evolutionary Applications*, 11, 1873-1885.
- 576 Herman, J. J., & Sultan, S. E. (2011). Adaptive transgenerational plasticity in plants: case studies,  
577 mechanisms, and implications for natural populations. *Frontiers in plant science*, 2, 102.
- 578 Herman, J. J., & Sultan, S. E. (2016). DNA methylation mediates genetic variation for adaptive  
579 transgenerational plasticity. *Proceedings of the Royal Society B: Biological Sciences*, 283,  
580 20160988.
- 581 Jacob, S., Chaine, A. S., Schtickzelle, N., Huet, M., & Clobert, J. (2015). Social information from  
582 immigrants: multiple immigrant-based sources of information for dispersal decisions in a  
583 ciliate. *Journal of Animal Ecology*, 84, 1373-1383.
- 584 Jacob, S., Wehi, P., Clobert, J., Legrand, D., Schtickzelle, N., Huet, M., & Chaine, A. (2016).  
585 Cooperation-mediated plasticity in dispersal and colonization. *Evolution*, 70, 2336-2345.
- 586 Jacob, S., Chaine, A. S., Huet, M., Clobert, J., & Legrand, D. (2019). Variability in dispersal  
587 syndromes is a key driver of metapopulation dynamics in experimental microcosms. In press.
- 588 Kooke, R., Johannes, F., Wardenaar, R., Becker, F., Etcheverry, M., Colot, V., Vreugdenhil, D.,  
589 & Keurentjes, J. J. (2015). Epigenetic basis of morphological variation and phenotypic  
590 plasticity in *Arabidopsis thaliana*. *The Plant Cell*, 27, 337-348.
- 591 Legrand, D., Larranaga, N., Bertrand, R., Ducatez, S., Calvez, O., Stevens, V. M., & Baguette, M.  
592 (2016). Evolution of a butterfly dispersal syndrome. *Proceedings of the Royal Society B:*  
593 *Biological Sciences*, 283, 20161533.
- 594 Lenormand, T. (2002). Gene flow and the limits to natural selection. *Trends in Ecology &*  
595 *Evolution*, 17, 183-189.
- 596 Liu, Z., & Adams, K. L. (2007). Expression partitioning between genes duplicated by polyploidy  
597 under abiotic stress and during organ development. *Current Biology*, 17, 1669-1674.
- 598 Marshall, D. J. (2008). Transgenerational plasticity in the sea: Context-dependent maternal  
599 effects across the life history. *Ecology*, 89, 418-427.
- 600 Mochizuki, K. (2012). Developmentally programmed, RNA-directed genome rearrangement in  
601 Tetrahymena. *Development, growth & differentiation*, 54, 108-119.
- 602 Morris, S. A., Rao, B., Garcia, B. A., Hake, S. B., Diaz, R. L., Shabanowitz, J., Hunt, D. F.,  
603 Allis, C. D., Lieb, J. D. & Strahl, B. D. (2007). Identification of histone H3 lysine 36  
604 acetylation as a highly conserved histone modification. *Journal of Biological Chemistry*, 282,  
605 7632-7640.
- 606 Murren, C. J., Auld, J. R., Callahan, H., Ghaleb, C. K., Handelsman, C. A., Heskell, M. A.,  
607 Kingsolver, J. G., Maclean, H. J., Masel, J., Maughan, H., Pfennig, D. W., Relyea, R. A.,  
608 Seiter, S., Snell-Rood, E., Steiner, U. K., & Schlichting, C. D. (2015). Constraints on the  
609 evolution of phenotypic plasticity: limits and costs of phenotype and plasticity. *Heredity*, 115,  
610 293.
- 611 Ochocki, B. M., & Miller, T. E. (2017). Rapid evolution of dispersal ability makes biological  
612 invasions faster and more variable. *Nature communications*, 8, 14315.
- 613 Orr, H.A. (2009) Fitness and its role in evolutionary genetics. *Nature Reviews Genetics*, 10, 531-  
614 539.
- 615 Pennekamp, F., & Schtickzelle, N. (2013) Implementing image analysis in laboratory-based  
616 experimental systems for ecology and evolution: a hands-on guide. *Methods in Ecology and*  
617 *Evolution*, 4, 483-492.
- 618 Pennekamp, F., Mitchell, K. A., Chaine, A., & Schtickzelle, N. (2014). Dispersal propensity in  
619 Tetrahymena thermophila ciliates—a reaction norm perspective. *Evolution*, 68(8), 2319-2330.

- 620 Perkins, A. T., Phillips, B. L., Baskett, M. L., & Hastings, A. (2013). Evolution of dispersal and  
621 life history interact to drive accelerating spread of an invasive species. *Ecology Letters*, 16,  
622 1079-1087.
- 623 Raffard, A., Santoul, F., Cucherousset, J., & Blanchet, S. (2019). The community and ecosystem  
624 consequences of intraspecific diversity: a meta-analysis. *Biological Reviews*, 94, 648-661.
- 625 Richards, E. J. (2006). Inherited epigenetic variation—revisiting soft inheritance. *Nature Reviews*  
626 *Genetics*, 7, 395.
- 627 Ronce, O. (2007). How does it feel to be like a rolling stone? Ten questions about dispersal  
628 evolution. *Annual Review of Ecology, Evolution, and Systematics*, 38, 231-253.
- 629 Ronce O, Clobert J. Dispersal syndromes. In: Clobert J, Baguette M, Benton TG, Bullock JM,  
630 editors. *Dispersal Ecology and Evolution*. Oxford: Oxford University Press; 2012. pp. 119–  
631 138.
- 632 Saastamoinen, M., Bocedi, G., Cote, J., Legrand, D., Guillaume, F., Wheat, C.W., Fronhofer,  
633 E.A., Garcia, C., Henry, R., Husby, A., Baguette, M., Bonte, D., Coulon, A., Kokko, H.,  
634 Matthysen, E., Niitepöld, K., Nonaka, E., Stevens, V.M., Travis, J.M., Donohue, K., Bullock,  
635 J.M., del Mar Delgado, M. (2018) Genetics of dispersal. *Biological Reviews*, 93, 574-599.
- 636 Scheiner, S. M., & Holt, R. D. (2012). The genetics of phenotypic plasticity. X. Variation versus  
637 uncertainty. *Ecology and evolution*, 2(4), 751-767.
- 638 Scheiner, S. M., Barfield, M., & Holt, R. D. (2017). The genetics of phenotypic plasticity. XV.  
639 Genetic assimilation, the Baldwin effect, and evolutionary rescue. *Ecology and Evolution*, 7,  
640 8788-8803.
- 641 Slatkin, M. (1987). Gene flow and the geographic structure of natural populations. *Science*, 236,  
642 787-792.
- 643 Stevens, V. M., Trochet, A., Blanchet, S., Moulherat, S., Clobert, J., & Baguette, M. (2013).  
644 Dispersal syndromes and the use of life-histories to predict dispersal. *Evolutionary*  
645 *applications*, 6, 630-642.
- 646 Schtickzelle, N., Fjerdingstad, E. J., Chaine, A., & Clobert, J. (2009). Cooperative social clusters  
647 are not destroyed by dispersal in a ciliate. *BMC Evolutionary Biology*, 9, 251.
- 648 Uller, T. (2008). Developmental plasticity and the evolution of parental effects. *Trends in*  
649 *Ecology & Evolution*, 23, 432-438.
- 650 Vastenhouw, N. L., Brunschwig, K., Okihara, K. L., Müller, F., Tijsterman, M., & Plasterk, R. H.  
651 (2006). Gene expression: long-term gene silencing by RNAi. *Nature*, 442, 882.
- 652 Vu, W. T., Chang, P. L., Moriuchi, K. S., & Friesen, M. L. (2015). Genetic variation of  
653 transgenerational plasticity of offspring germination in response to salinity stress and the seed  
654 transcriptome of *Medicago truncatula*. *BMC Evolutionary Biology*, 15, 59.
- 655 Zaghlool, S. B., Al-Shafai, M., Al Muftah, W. A., Kumar, P., Gieger, C., Waldenberger, M.,  
656 Falchi, M., & Suhre, K. (2016). Mendelian inheritance of trimodal CpG methylation sites  
657 suggests distal cis-acting genetic effects. *Clinical Epigenetics*, 8, 124.
